# Supplementary material for: Evaluation of an Online Version of the CFT 20-R in Third and Fourth Grade Children
Source: MDPI journal article supplement (doi:10.3390/children9040512), 2022-04-04
Supplement: s1 [file s1]

**Supplementary Table S1.** Item difficulties**Series**

| Item difficulties |                 |                            |                          |            |
|-------------------|-----------------|----------------------------|--------------------------|------------|
| item              | correct answer  | online ( <i>N</i> = 4 100) | online ( <i>N</i> = 220) | PP         |
| 1                 | d               | .98                        | .98                      | 1.00       |
| 2                 | b               | .96                        | .96                      | .98        |
| 3                 | e               | .99                        | .99                      | .96        |
| <b>4</b>          | <b><i>a</i></b> | <b>.28</b>                 | <b>.27</b>               | <b>.90</b> |
| 5                 | e               | .92                        | .92                      | .89        |
| 6                 | b               | .71                        | .74                      | .92        |
| 7                 | c               | .74                        | .75                      | .89        |
| 8                 | c               | .58                        | .62                      | .59        |
| 9                 | d               | .59                        | .60                      | .76        |
| <b>10</b>         | <b><i>a</i></b> | <b>.20</b>                 | <b>.20</b>               | <b>.60</b> |
| <b>11</b>         | <b><i>b</i></b> | <b>.39</b>                 | <b>.41</b>               | <b>.70</b> |
| <b>12</b>         | <b><i>a</i></b> | <b>.32</b>                 | <b>.30</b>               | <b>.73</b> |
| 13                | c               | .40                        | .43                      | .28        |
| 14                | d               | .30                        | .37                      | .35        |
| 15                | e               | .28                        | .25                      | .21        |

Notes. ***Numbers in bold and italic*** show differences in item difficulties  $\geq .20$ ; PP = Paper-Pencil.

## Classifications

| Item difficulties |                 |                            |                          |                   |
|-------------------|-----------------|----------------------------|--------------------------|-------------------|
| item              | correct answer  | online ( <i>N</i> = 4 100) | online ( <i>N</i> = 220) | PP                |
| 1                 | d               | .99                        | 1.00                     | .98               |
| 2                 | a               | .79                        | .76                      | .88               |
| 3                 | b               | .84                        | .88                      | .90               |
| 4                 | a               | .73                        | .75                      | .78               |
| 5                 | e               | .76                        | .75                      | .86               |
| 6                 | c               | .55                        | .55                      | .63               |
| 7                 | <b><i>b</i></b> | <b><i>.58</i></b>          | <b><i>.54</i></b>        | <b><i>.77</i></b> |
| 8                 | a               | .39                        | .41                      | .47               |
| 9                 | c               | .41                        | .45                      | .55               |
| <b><i>10</i></b>  | <b><i>e</i></b> | <b><i>.78</i></b>          | <b><i>.76</i></b>        | <b><i>.25</i></b> |
| 11                | c               | .32                        | .35                      | .36               |
| 12                | e               | .40                        | .40                      | .45               |
| 13                | d               | .41                        | .38                      | .39               |
| 14                | d               | .36                        | .35                      | .24               |
| 15                | b               | .09                        | .10                      | .07               |

Notes. ***Numbers in bold and italic*** show differences in item difficulties  $\geq .20$ ; PP = Paper-Pencil.

## Matrices

| Item difficulties |                |                            |                          |            |
|-------------------|----------------|----------------------------|--------------------------|------------|
| item              | correct answer | online ( <i>N</i> = 4 100) | online ( <i>N</i> = 220) | PP         |
| 1                 | b              | .96                        | .96                      | 1.00       |
| 2                 | c              | .98                        | .98                      | 1.00       |
| 3                 | b              | .95                        | .96                      | .99        |
| 4                 | d              | .96                        | .96                      | .97        |
| 5                 | <i>b</i>       | <i>.41</i>                 | <i>.43</i>               | <i>.71</i> |
| 6                 | <i>a</i>       | <i>.56</i>                 | <i>.60</i>               | <i>.79</i> |
| 7                 | <i>e</i>       | <i>.57</i>                 | <i>.59</i>               | <i>.90</i> |
| 8                 | <i>d</i>       | <i>.55</i>                 | <i>.58</i>               | <i>.85</i> |
| 9                 | <i>c</i>       | <i>.34</i>                 | <i>.39</i>               | <i>.60</i> |
| 10                | <i>a</i>       | <i>.20</i>                 | <i>.21</i>               | <i>.64</i> |
| 11                | e              | .50                        | .52                      | .62        |
| 12                | c              | .41                        | .43                      | .38        |
| 13                | <i>d</i>       | <i>.59</i>                 | <i>.63</i>               | <i>.35</i> |
| 14                | e              | .33                        | .35                      | .16        |
| 15                | a              | .11                        | .08                      | .05        |

Notes. *Numbers in bold and italic* show differences in item difficulties  $\geq .20$ ; PP = Paper-Pencil.
